# Supplementary material for: Coherence among Head Direction Cells before Eye Opening in Rat Pups
Source: PubMed Central journal article supplement — Curr Biol. 2015 Jan 5;25(1):103–8. doi: 10.1016/j.cub.2014.11.009 (PMC4291142; doi:10.1016/j.cub.2014.11.009), 2015-01-05
Supplement: mmc1.pdf [file mmc1.pdf]

**Current Biology, Volume 24**

**Supplemental Information**

**Coherence among Head Direction Cells  
before Eye Opening in Rat Pups**

**Tale L. Bjerknes, Rosamund F. Langston, Ingvild U. Krüge, Edvard I. Moser, and  
May-Britt Moser**

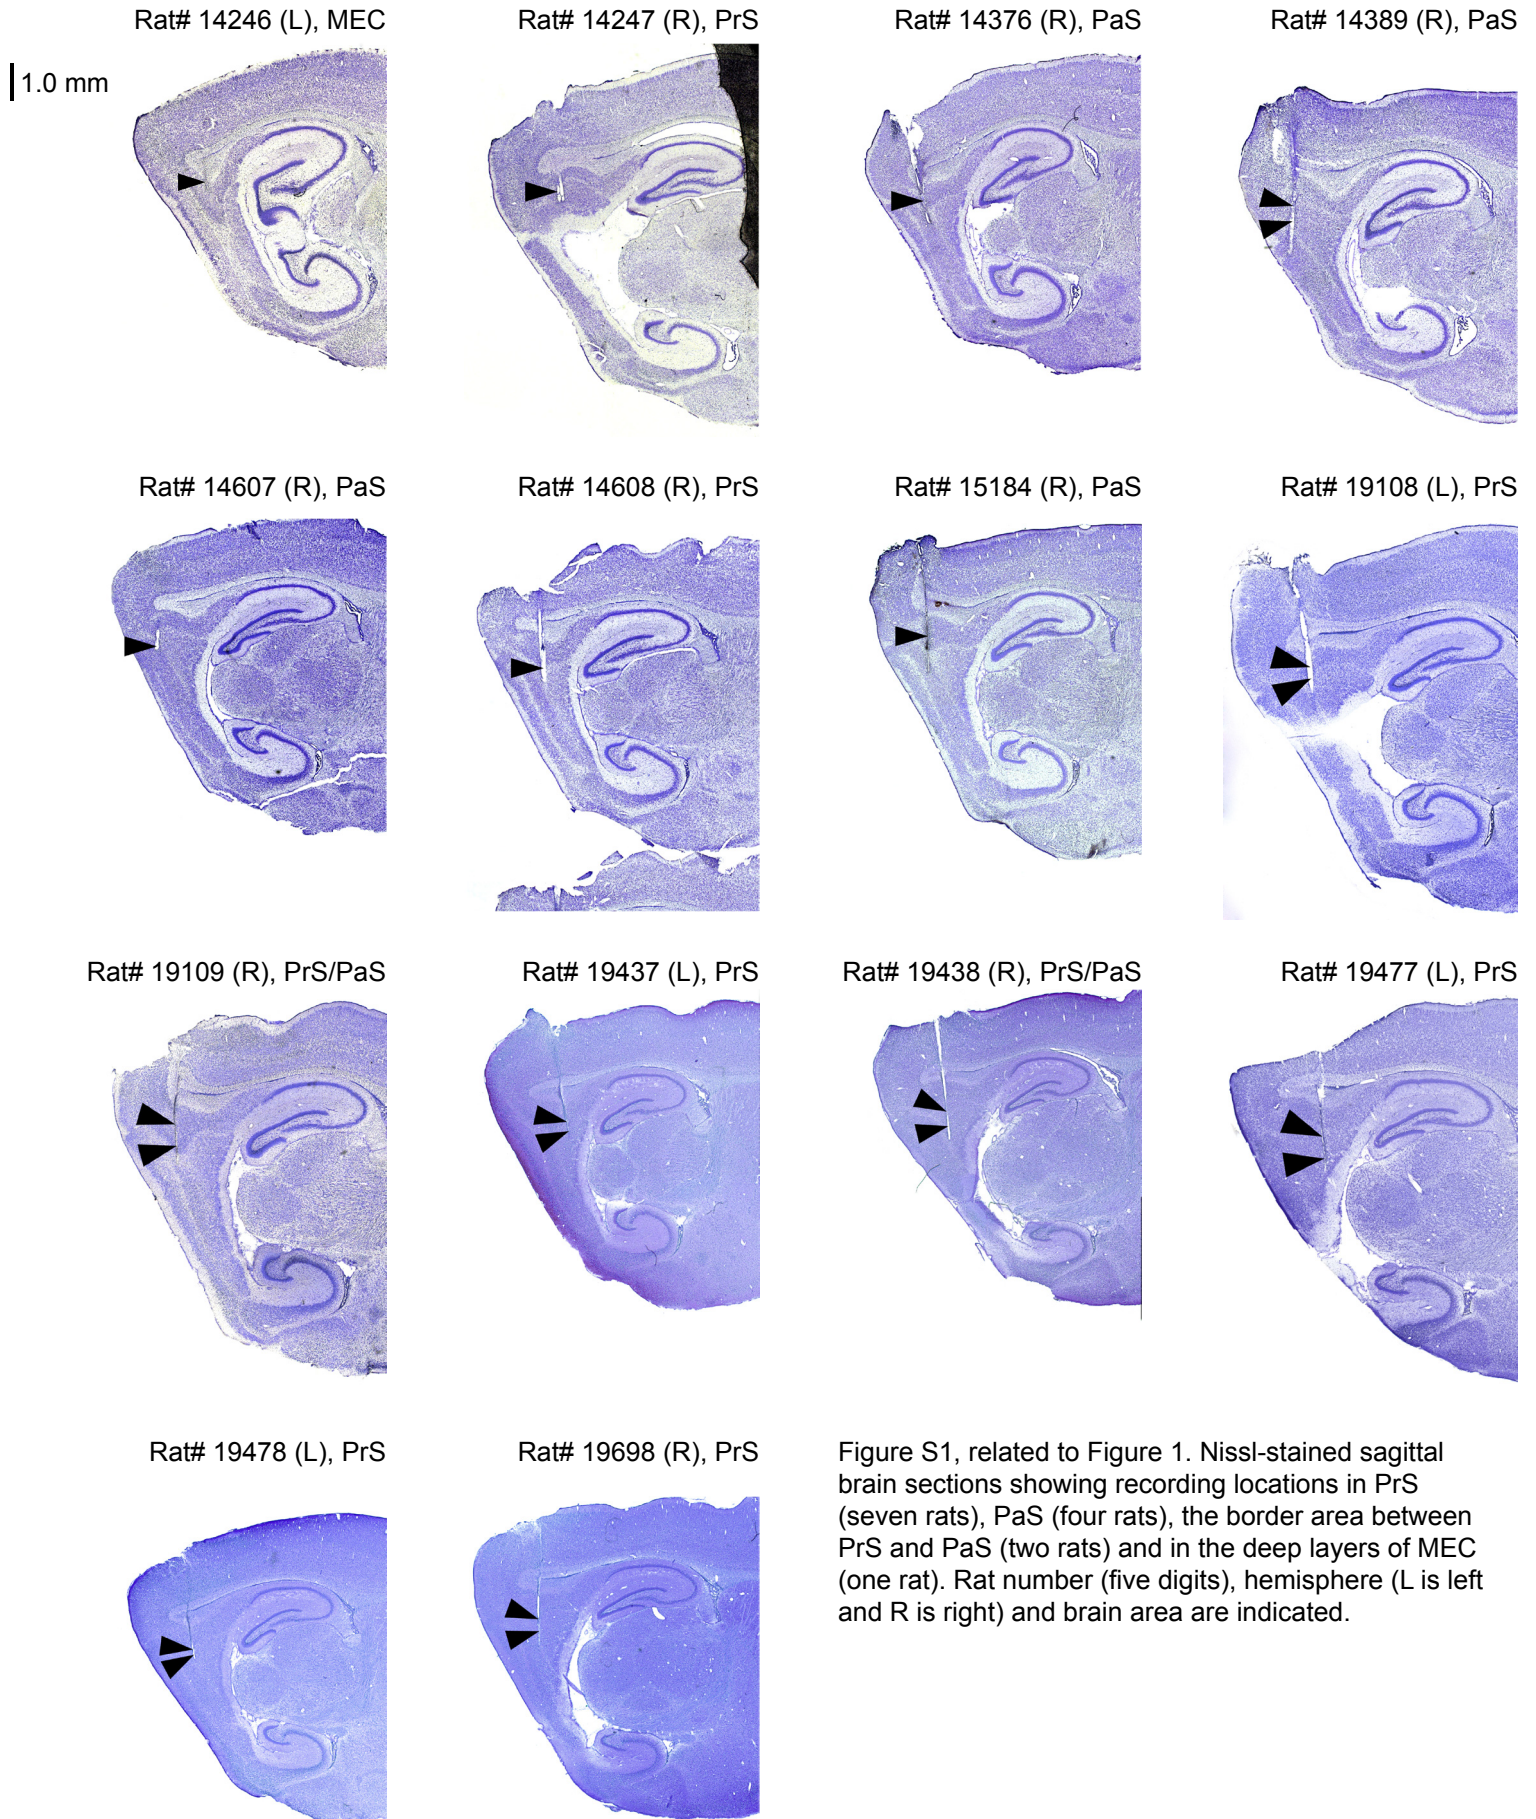

P15

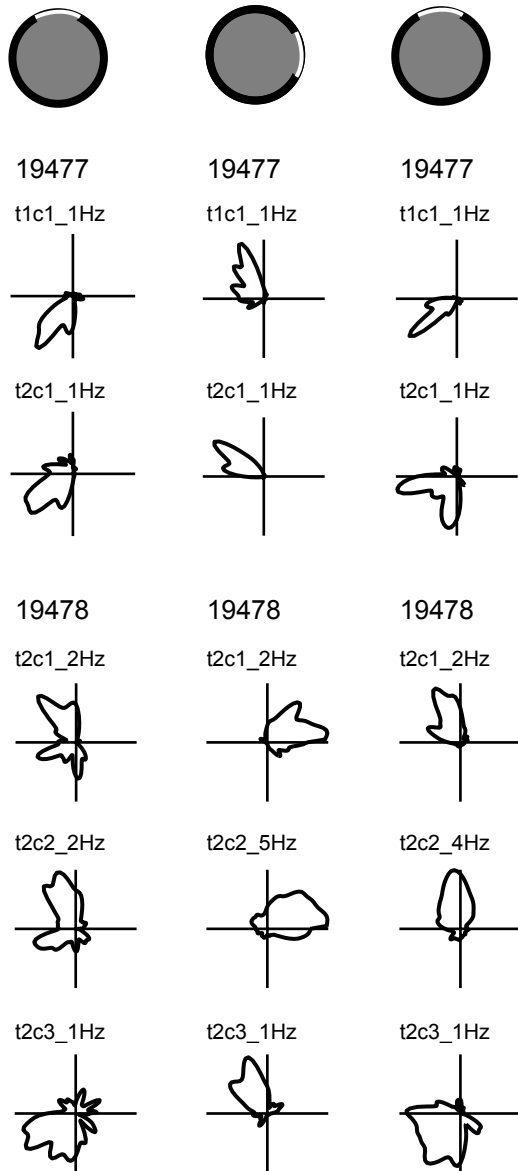

P16

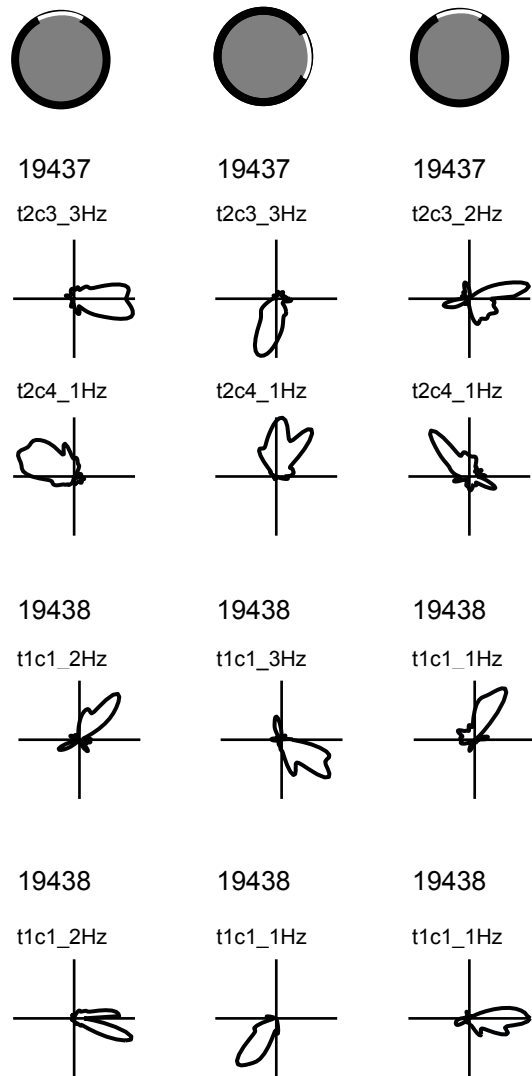

Figure S2, related to Figure 2. Visual cue-based rotation of head direction cells shortly after eye opening. Examples of three consecutive trials where the cue card in the recording arena was rotated 90 degrees clockwise in the middle trial. Schematic at the top shows position of cue card. Directional rate distribution is shown for 5 head direction cells from P15 and 4 head direction cells from P16. Rat number (five digits) is indicated for each set of trials. Cell number (t = tetrode, c = cell), and peak firing rates are indicated above each cell. All head directions were covered during all recording trials.
